# Supplementary material for: Trends and spatial shifts in lightning fires and smoke concentrations in response to 21st century climate over the forests of the Western United States
Source: Copernicus journal article supplement (doi:10.5194/acp-2020-80), 2020-02-20
Supplement: Supplementary file 1 [file acp-2020-80-supplement.pdf]

**Trends and spatial shifts in lightning fires and smoke concentrations  
in response to 21<sup>st</sup> century climate over the forests of the Western  
United States**

Y. Li<sup>1</sup>, L. J. Mickley<sup>1</sup>, P. Liu<sup>1</sup>, J. O. Kaplan<sup>2</sup>

<sup>1</sup>John A. Paulson School of Engineering and Applied Sciences, Harvard University, Cambridge,  
MA, USA

<sup>2</sup>Department of Earth Sciences, The University of Hong Kong, Hong Kong, China

*Correspondence to:* Yang Li ([yangli@seas.harvard.edu](mailto:yangli@seas.harvard.edu))

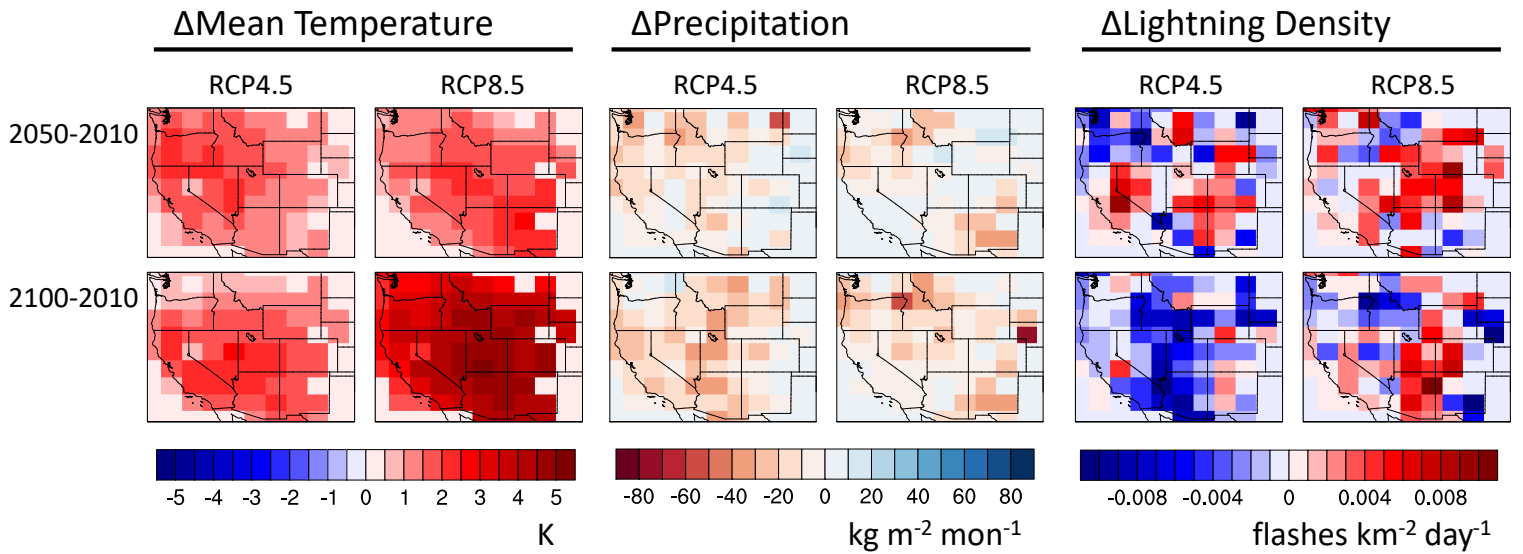

13

14 **Fig. S1.** Changes in monthly mean temperature, precipitation and lightning density averaged

15 over the fire season in the western U.S. for the RCP4.5 and RCP8.5 scenarios. The top row

16 shows changes between the present day and 2050, and the bottom row shows changes between

17 the present day and 2100. Temperature and precipitation are from GISS-E2-R for the RCP4.5

18 and RCP8.5 scenarios, with five years representing each time period. Lightning density is

19 calculated using the GISS convective mass flux following the empirical parameterization of

20 *Magi* [2015]. The fire season is July, August, and September.

## Evaluation of LPJ-LMfire fire emissions

We first evaluate the lightning-caused wildfire emissions from LPJ-LMfire over the National Forests in the western U.S. by comparing with the Global Fire Emissions Database (GFED4s) emissions over the same regions (Fig. S2). Lightning is the dominant fire source over the western U.S. forests, allowing a reasonable comparison between the two emission inventories over the forest areas in the West. The total fire-season dry matter burned (DM) over National Forests and Parks from LPJ-LMfire is 22.11 Tg for July-August-September (JAS), comparable to that from GFED4s (19.89 Tg), providing confidence in the LPJ-LMfire representation of fires without active suppression. GFED4s shows greater DM over northern Washington, Idaho, and northern California than LPJ-LMfire but overall the spatial mismatches are not large.

We then validate the carbonaceous fine particulate matter ( $PM_{2.5}$ ; BC+OC) generated by GEOS-Chem in a simulation with the combined emissions (LPJ-LMfire over the National Forests and Parks and GFED4s elsewhere) during JAS. Simulated BC and OC also include contributions from non-fire sources, such as fossil fuel combustion from transportation, industry, and power plants. We compare the GEOS-Chem results against ground-based measurements from the Interagency Monitoring of Protected Visual Environments (IMPROVE) network in the western U.S. We find that GEOS-Chem generally reproduces the IMPROVE observations, with elevated concentrations ( $\sim 3.0\text{--}5.0 \mu\text{g m}^{-3}$ ) over the northern states and in California (Fig. S3). In JAS, large amounts of smoke PM are transported from Canada, as implied by some IMPROVE observations in Idaho and Montana. GFED4s includes the smoke from these Canadian fires, as reflected by elevated smoke PM in the northeast corner of the domain in the GEOS-Chem results. Results in RCP8.5 for the present-day are similar to those under RCP4.5 (not shown). We also compare 5-year fire-season averages of smoke PM in each grid cell in the western U.S. from GEOS-Chem

against those from IMPROVE observations (Fig. S4). The GEOS-Chem simulation with combined emissions generally reproduces smoke PM within an uncertainty of 50%.

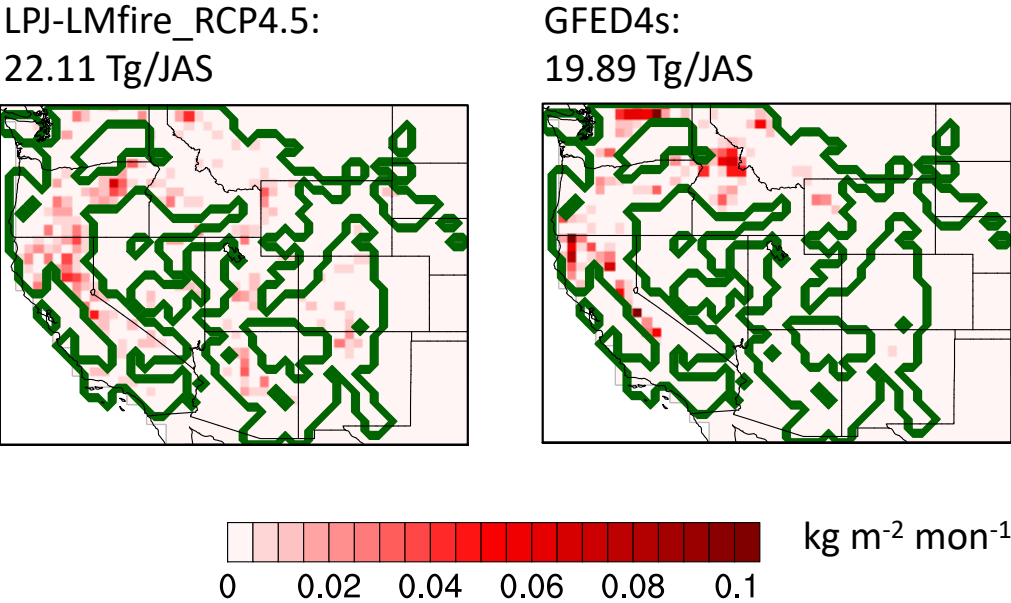

**Fig. S2.** Present-day (2011-2015) fire-season averaged lightning-caused dry matter burned (DM) over National Forests and Parks in the West for LPJ RCP4.5 and GFED4s. Bold green lines mark the boundaries of National Forests and Parks. Value are the total fire-season DM over the National Forests and Parks in the two inventories. The fire season is July, August, and September.

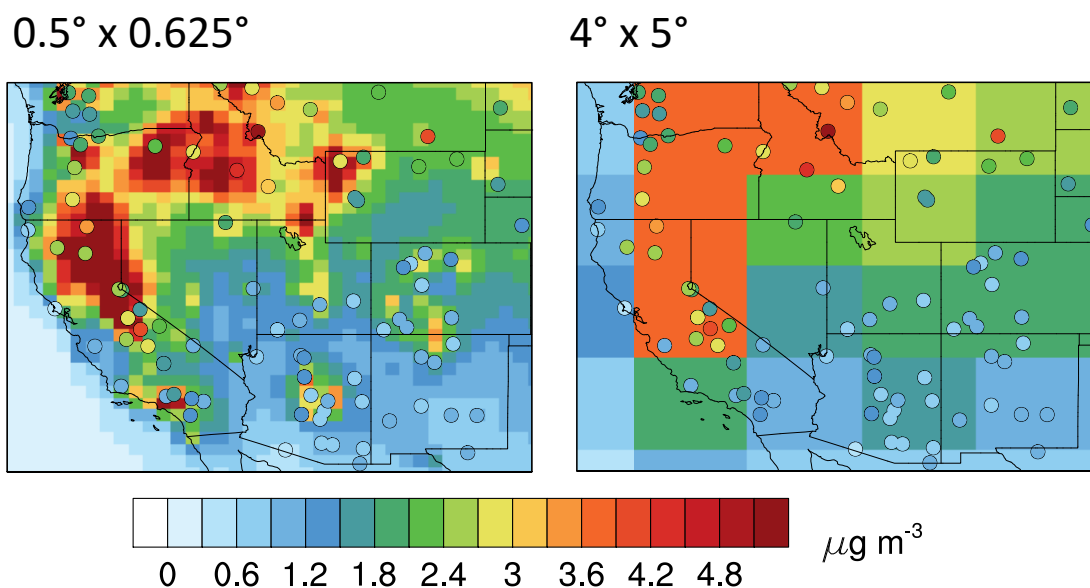

**Fig. S3.** Fire-season averaged smoke PM. Circles represent ground-based observations from the IMPROVE network. The colored background is from GEOS-Chem simulations at  $0.5^\circ \times 0.625^\circ$  and  $4^\circ \times 5^\circ$  spatial resolutions for the present-day (2011-2015) using the combined fire emissions from LPJ-LMfire over National Forests and Parks (within green boundaries in Fig. S2) and GFED4s over other regions. The fire season is July, August, and September.

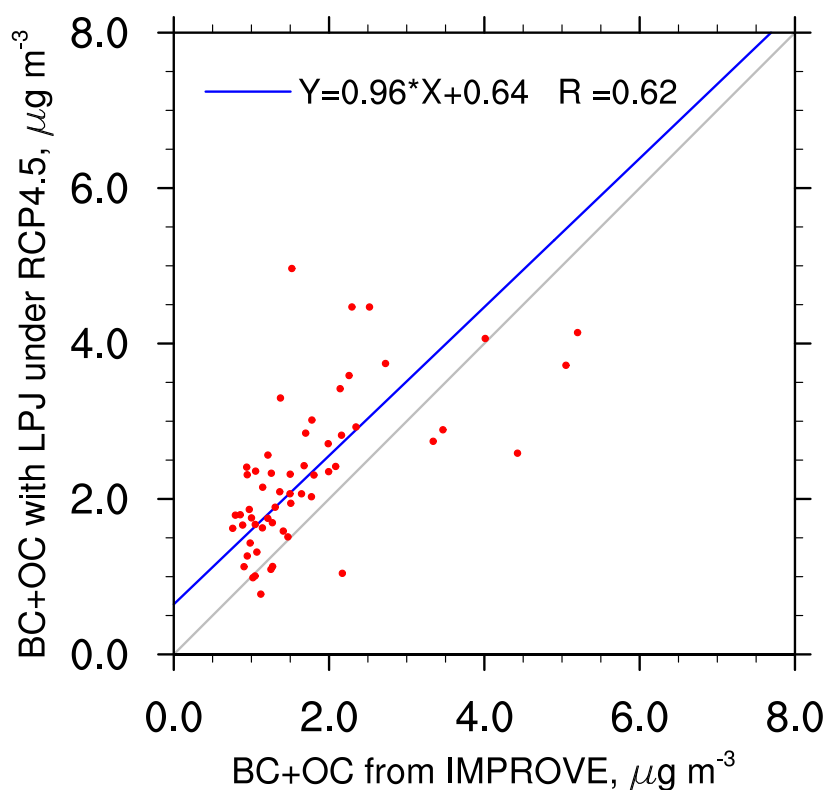

**Fig. S4.** BC+OC concentrations simulated with the present-day combined fire emissions from LPJ RCP4.5 (over National Forests) and GFED4s (over other regions) compared to those from IMPROVE observations. Each dot represents the 5-year fire-season average of concentrations in each grid square (with the resolution of  $4^\circ \times 5^\circ$ ) across the western U.S. The blue line is the fitted line using reduced major axis (RMA) regression between the GEOS-Chem simulations and those from IMPROVE. The grey line denotes the 1:1 line.

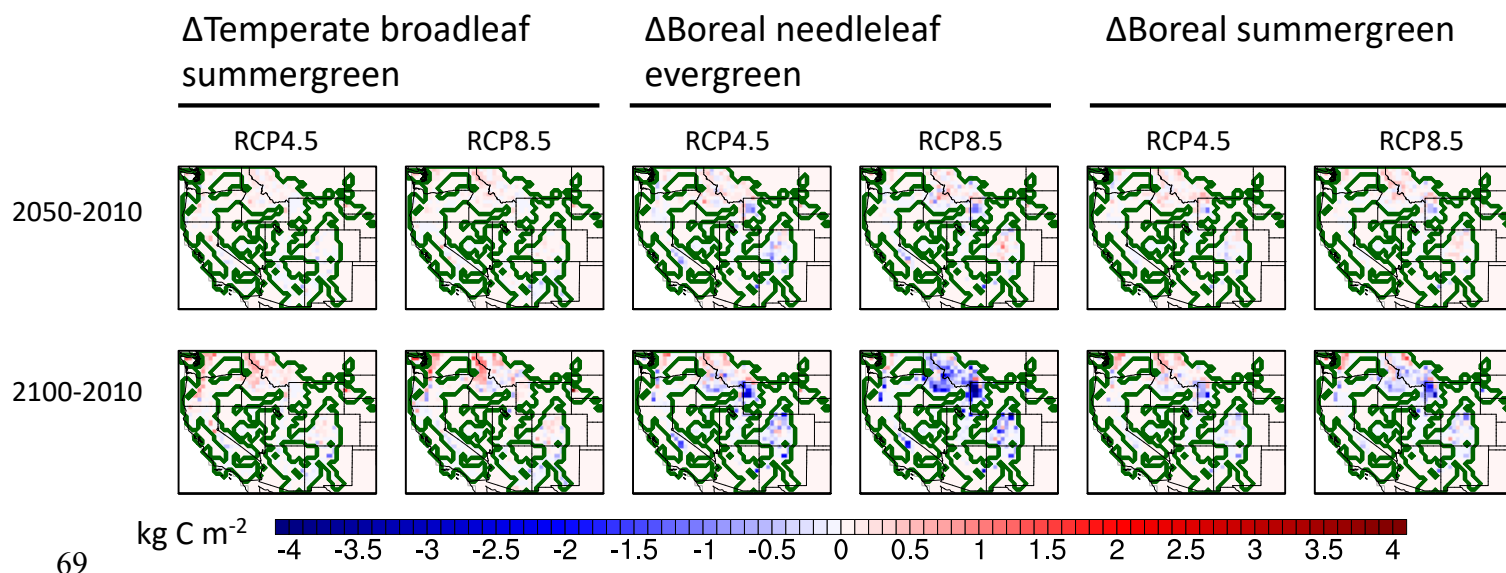

**Fig. S5.** Simulated changes in living biomass for the three most dominant plant functional types over the National Forests in the western U.S. for the RCP4.5 and RCP8.5 scenarios. The top row shows changes between the present day and 2050, and the bottom row shows changes between the present day and 2100. Results are from LPJ-LMfire, with five years representing each time period. The fire season is July, August, and September.

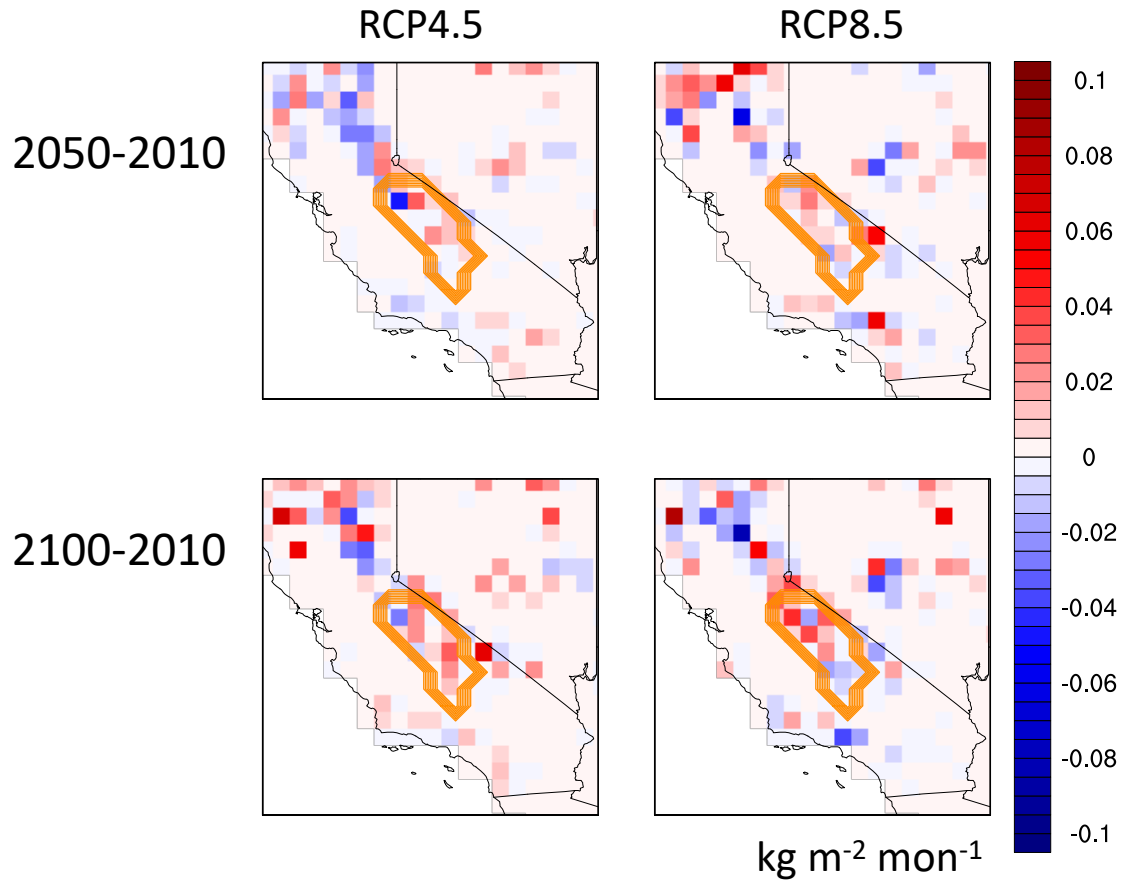

**Fig. S6.** Simulated changes in monthly mean lightning-caused DM averaged over the fire season over National Forests in California for the RCP4.5 and RCP8.5 scenarios. The top row shows changes in DM between the present day and 2050, and the bottom row shows changes between the present day and 2100. Results are from LPJ-LMfire for the RCP4.5 and RCP8.5 scenarios, with five years representing each time period. The fire season is July, August, and September. Bold orange lines mark the boundaries of the Sierra Nevada (SN).



84 **Table S1.** Comparison of fire predictions in the U.S. under future climate.

| <b>Methods</b>                                                                            | <b>Region, scenarios, and future time slice</b>            | <b>Fire metric and percent increase relative to present day</b>          | <b>Smoke PM and percent increase relative to present day</b>                          | <b>Reference</b>            |
|-------------------------------------------------------------------------------------------|------------------------------------------------------------|--------------------------------------------------------------------------|---------------------------------------------------------------------------------------|-----------------------------|
| Statistical models for lightning fires                                                    | Entire U.S.<br>Doubled CO <sub>2</sub><br>climate          | Number of fires:<br>44%<br>Area burned: 78%                              |                                                                                       | Price and Rind, 1994        |
| Two climate models                                                                        | Entire U.S.<br>Doubled CO <sub>2</sub><br>climate<br>~2060 | Seasonal fire severity rating: 10-50%                                    |                                                                                       | Flannigan et al., 2000      |
| Statistical model                                                                         | California, U.S.<br>A2<br>~2100                            | Large fire risk: 12-53%                                                  |                                                                                       | Westerling and Bryant, 2008 |
| Statistical models and GEOS-Chem                                                          | Western U.S.<br>A1B<br>~2050                               | Area burned: 54%<br>Smoke emission: 100%                                 | Smoke PM concentrations<br>BC: 20%<br>OC: 40%                                         | Spracklen et al., 2009      |
| Climate model with global-scale fire parameterization                                     | Global<br>B1, A1B, A2<br>~2100                             | Fire occurrence in the western U.S.<br>B1: 120%<br>A1B: 233%<br>A2: 242% |                                                                                       | Pechony and Shindell, 2010  |
| MAPSS-CENTURY 1 dynamic general vegetation model                                          | U.S. Pacific Northwest<br>A2<br>~2100                      | Area burned: 76-310%<br>Burn severity: 29-41%                            |                                                                                       | Rogers et al., 2011         |
| Statistical models + GEOS-Chem                                                            | Western U.S.<br>A1B<br>~2050                               | Area burned: 63-169%<br>Smoke PM emissions: 150-170%                     | Smoke PM concentrations: 43-55%                                                       | Yue et al., 2013            |
| Statistical models                                                                        | California, U.S.<br>A1B<br>~2050                           | Area burned: 10-100%                                                     |                                                                                       | Yue et al., 2014            |
| Coupled Community Land Model (CLMv4) and Community Earth System Model (CESM) <sup>2</sup> | Western U.S.<br>RCP4.5 and RCP8.5<br>~2050                 | Smoke PM emissions:<br>• RCP4.5: 100%<br>• RCP8.5: 50%                   | Total PM <sub>2.5</sub> concentrations <sup>1</sup><br>• RCP4.5: 22%<br>• RCP8.5: 63% | Val Martin et al., 2015     |

|                                                                       |                                                                                                  |                                                                                                                                                                                |                                                                                                                                                 |                     |
|-----------------------------------------------------------------------|--------------------------------------------------------------------------------------------------|--------------------------------------------------------------------------------------------------------------------------------------------------------------------------------|-------------------------------------------------------------------------------------------------------------------------------------------------|---------------------|
| CLMv4.5-BGC with fire parameterization coupled with CESM <sup>3</sup> | Contiguous U.S. RCP4.5 and RCP8.5 ~2050 and ~2100<br><br>Relative to the present day (1995-2005) | Area burned by 2050:<br>• RCP4.5: 67%<br>• RCP8.5: 50%<br>by 2100:<br>• RCP4.5: 58%<br>• RCP8.5: 108%                                                                          | Total PM <sub>2.5</sub> concentrations <sup>1</sup> by 2050:<br>• RCP4.5: 146%<br>• RCP8.5: 85%<br>by 2100:<br>• RCP4.5: 108%<br>• RCP8.5: 246% | Pierce et al., 2017 |
| CLMv4.5 with fire parameterization coupled with CESM <sup>3</sup>     | Contiguous U.S. RCP4.5 & RCP8.5 ~2050 and ~2100<br><br>Relative to the present day (2000-2010)   | Smoke PM emissions by 2050:<br>• RCP4.5: 126%<br>• RCP8.5: 54%<br>by 2100:<br>• RCP4.5: 125%<br>• RCP8.5: 149%<br><br>by 2050 over the West:<br>• RCP4.5: 45%<br>• RCP8.5: 40% | Total PM <sub>2.5</sub> concentrations <sup>1</sup> by 2050:<br>• RCP4.5: 113%<br>• RCP8.5: 27%<br>by 2100:<br>• RCP4.5: 93%<br>• RCP8.5: 127%  | Ford et al., 2018   |
| LPJ-LMfire coupled with GEOS-Chem                                     | Western U.S. RCP4.5 and RCP8.5 ~2050 and ~2100<br><br>Relative to the present day (2011-2015)    | Smoke PM emissions by 2050:<br>• RCP4.5: 81%<br>• RCP8.5: 86%<br>by 2100:<br>• RCP4.5: 111%<br>• RCP8.5: 161%                                                                  | Smoke PM concentrations by 2100:<br>• RCP4.5: 53%<br>• RCP8.5: 109%                                                                             | This study          |

<sup>1</sup> Total PM<sub>2.5</sub> is the combination of sulfate, ammonium nitrate, secondary organic aerosols, fine dust, fine sea salt, BC and OC.

<sup>2</sup> This model considers changes in climate, anthropogenic emissions, land cover, and land use.

<sup>3</sup> This model considers changes in climate, anthropogenic emissions, land cover, land use, and population.

## References

- Flannigan, M. D., Stocks, B. J., and Wotton, B. M.: Climate change and forest fires, *Science of the total environment*, 262, 221-229, 2000.
- Ford, B., Val Martin, M., Zelasky, S., Fischer, E., Anenberg, S., Heald, C., and Pierce, J.: Future fire impacts on smoke concentrations, visibility, and health in the contiguous United States, *GeoHealth*, 2, 229-247, 2018.
- Pechony, O., and Shindell, D. T.: Driving forces of global wildfires over the past millennium and the forthcoming century, *Proceedings of the National Academy of Sciences*, 107, 19167-19170, 2010.
- Pierce, J., Val Martin, M., and Heald, C.: Estimating the effects of changing climate on fires and consequences for US air quality, using a set of global and regional climate models—Final report to the Joint Fire Science Program, Fort Collins (CO): Joint Fire Science Program, 2017.
- Price, C., and Rind, D.: The impact of a  $2\times$  CO<sub>2</sub> climate on lightning-caused fires, *Journal of Climate*, 7, 1484-1494, 1994.
- Rogers, B. M., Neilson, R. P., Drapek, R., Lenihan, J. M., Wells, J. R., Bachelet, D., and Law, B. E.: Impacts of climate change on fire regimes and carbon stocks of the US Pacific Northwest, *Journal of Geophysical Research: Biogeosciences*, 116, 2011.
- Spracklen, D. V., Mickley, L. J., Logan, J. A., Hudman, R. C., Yevich, R., Flannigan, M. D., and Westerling, A. L.: Impacts of climate change from 2000 to 2050 on wildfire activity and carbonaceous aerosol concentrations in the western United States, *Journal of Geophysical Research: Atmospheres*, 114, 2009.
- Val Martin, M., Heald, C., Lamarque, J.-F., Tilmes, S., Emmons, L., and Schichtel, B.: How emissions, climate, and land use change will impact mid-century air quality over the United States: a focus on effects at national parks, *Atmospheric Chemistry and Physics*, 15, 2805-2823, 2015.
- Westerling, A., and Bryant, B.: Climate change and wildfire in California, *Climatic Change*, 87, 231-249, 2008.
- Yue, X., Mickley, L. J., Logan, J. A., and Kaplan, J. O.: Ensemble projections of wildfire activity and carbonaceous aerosol concentrations over the western United States in the mid-21st century, *Atmos Environ*, 77, 767-780, 2013.
- Yue, X., Mickley, L. J., and Logan, J. A.: Projection of wildfire activity in southern California in the mid-twenty-first century, *Climate dynamics*, 43, 1973-1991, 2014.
